# Supplementary material
Source: MDPI journal article supplement (https://www.mdpi.com/2673-9984/2/1/40)
Supplement: s1 [file s1]

# Dynamics of Anisotropic Cylindrical Collapse In Energy-Momentum Squared Gravity

**Speaker: Prof. Dr. Muhammad Sharif**

**Department of Mathematics**  
**University of the Punjab**  
**Lahore**

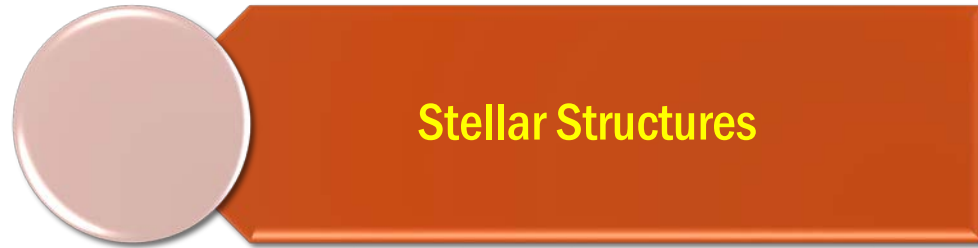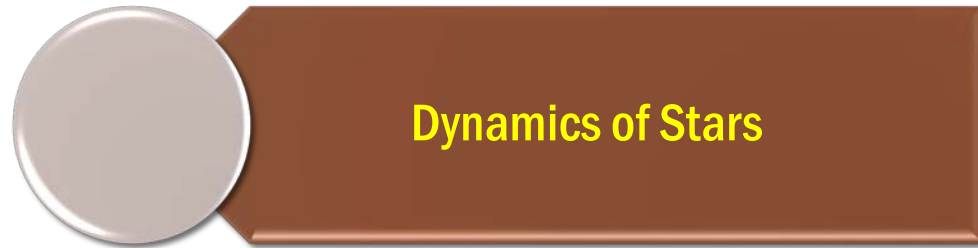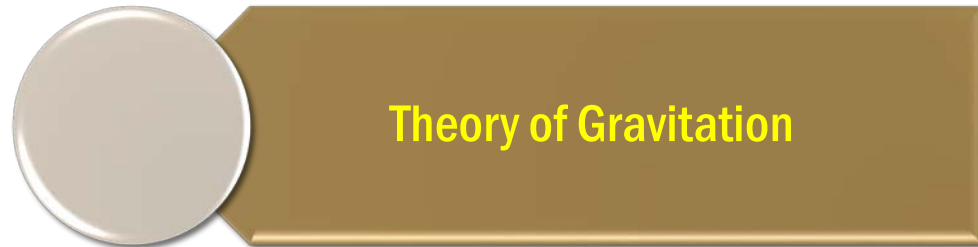



**Modified Theories**



**Research Work**



**Concluding Remarks**

# Stellar Structures

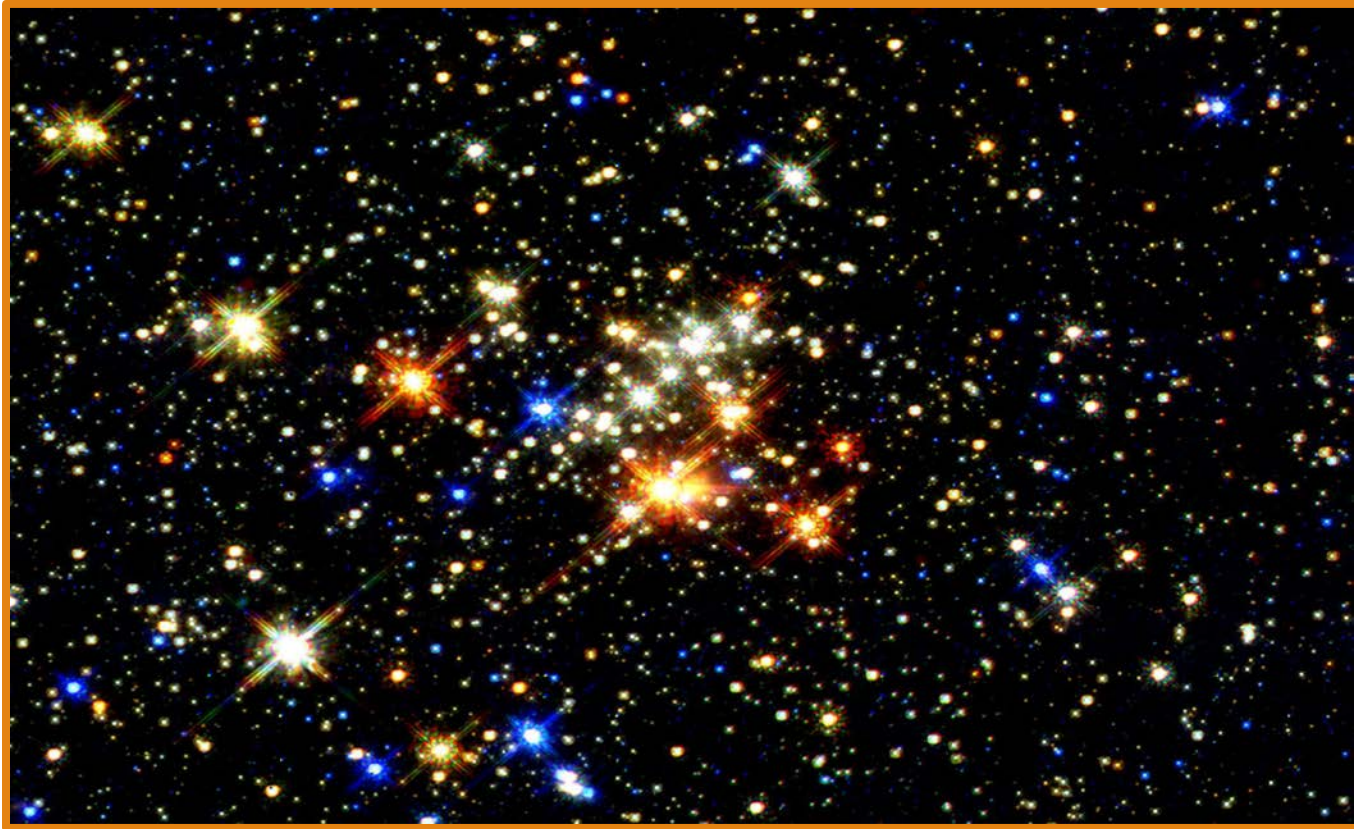

❖ Bounded together by their own gravity.

# Temperature of Stars

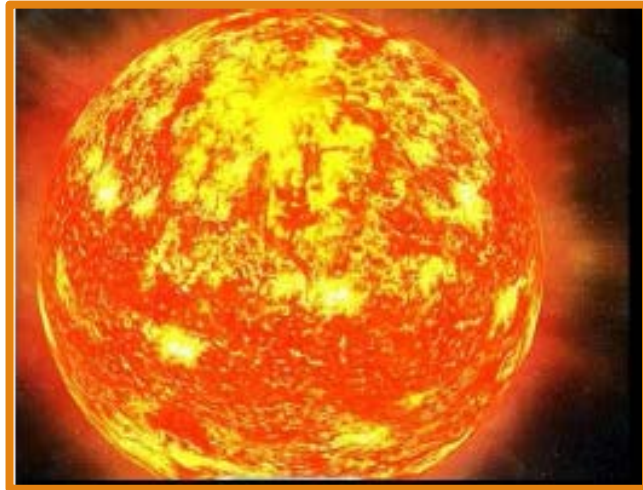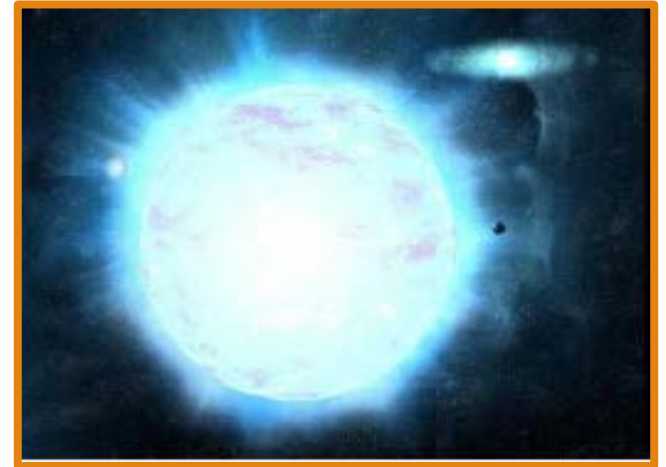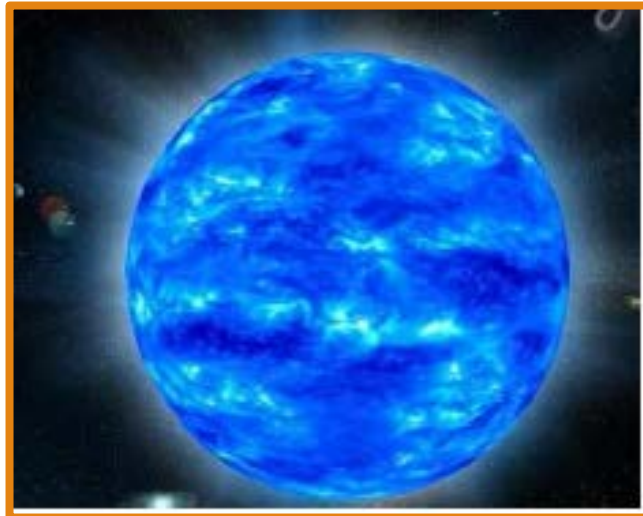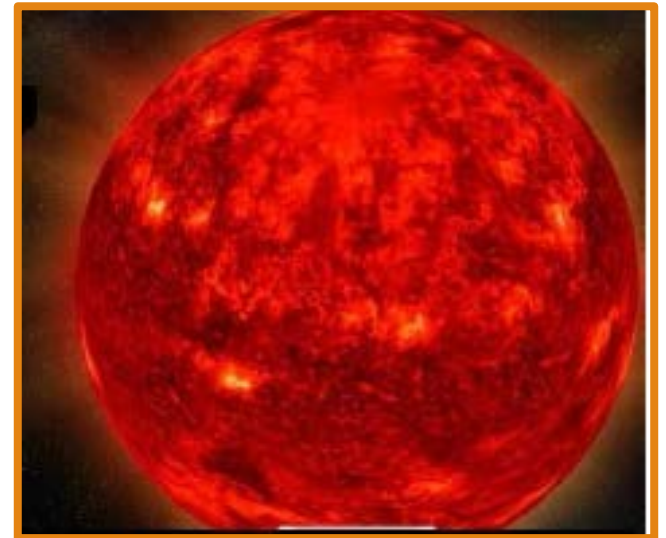

| Surface temperatures in °C | Colour of the star |                                                                                      |
|----------------------------|--------------------|--------------------------------------------------------------------------------------|
| 30000 – 60000              | Blue               |   |
| 10000 – 30000              | Blue white         |   |
| 7500 – 10000               | White              |   |
| 6000 – 7500                | Yellow white       |   |
| 5000 – 6000                | Yellow             |   |
| 3500 – 5000                | Orange             |   |
| < 3500                     | Red                |  |

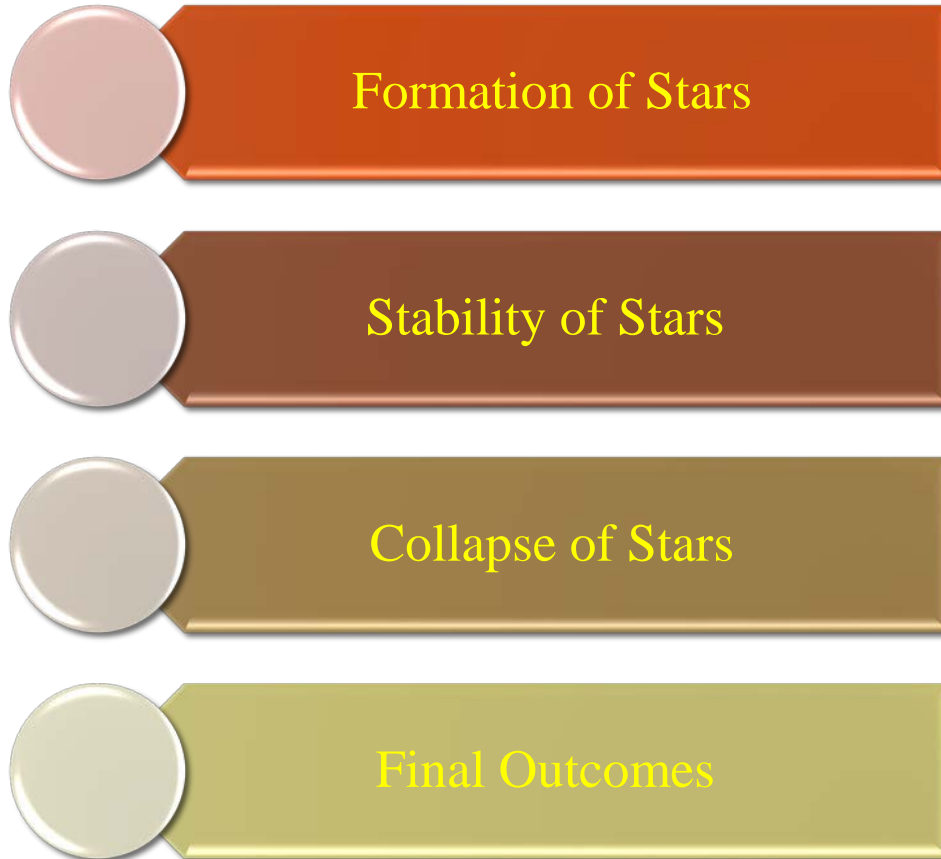

# Formation of Stars

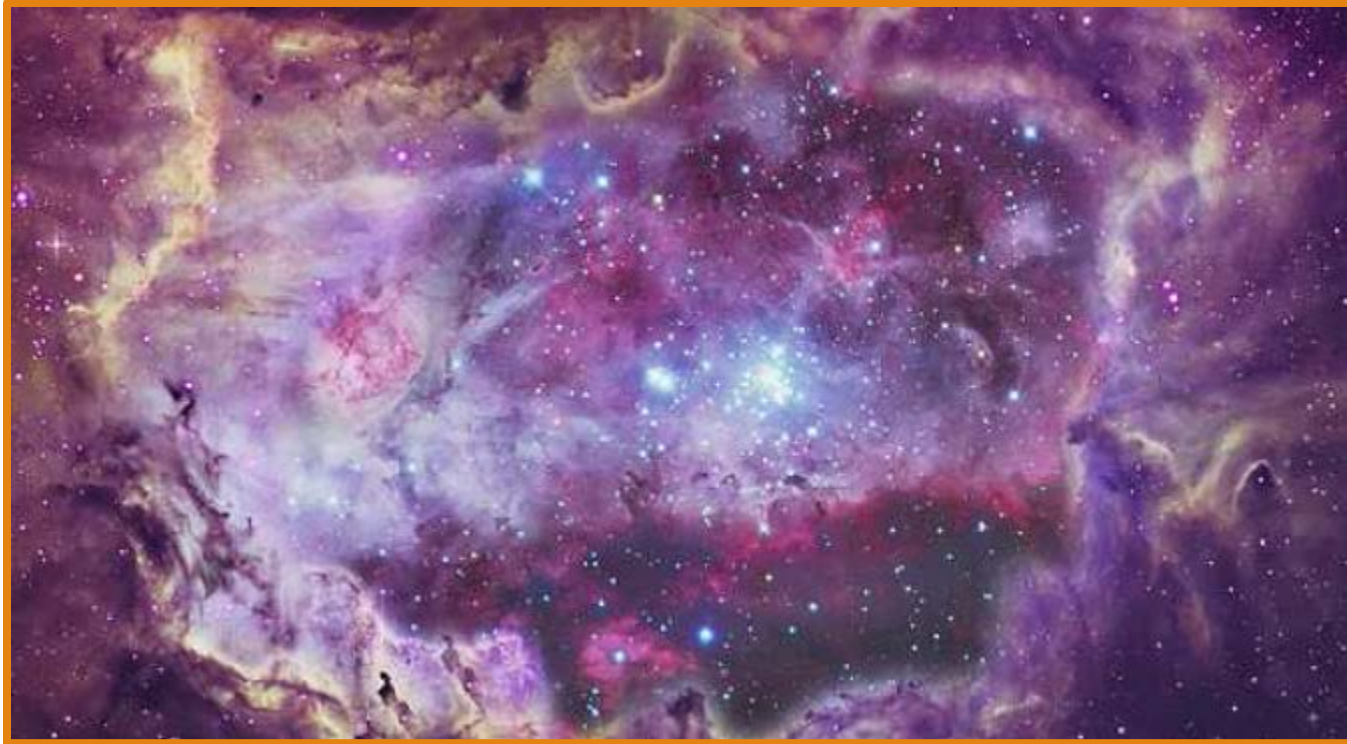

- ❖ Stars are formed in clouds of dust and gasses known as nebulae.



# Stability of Stars

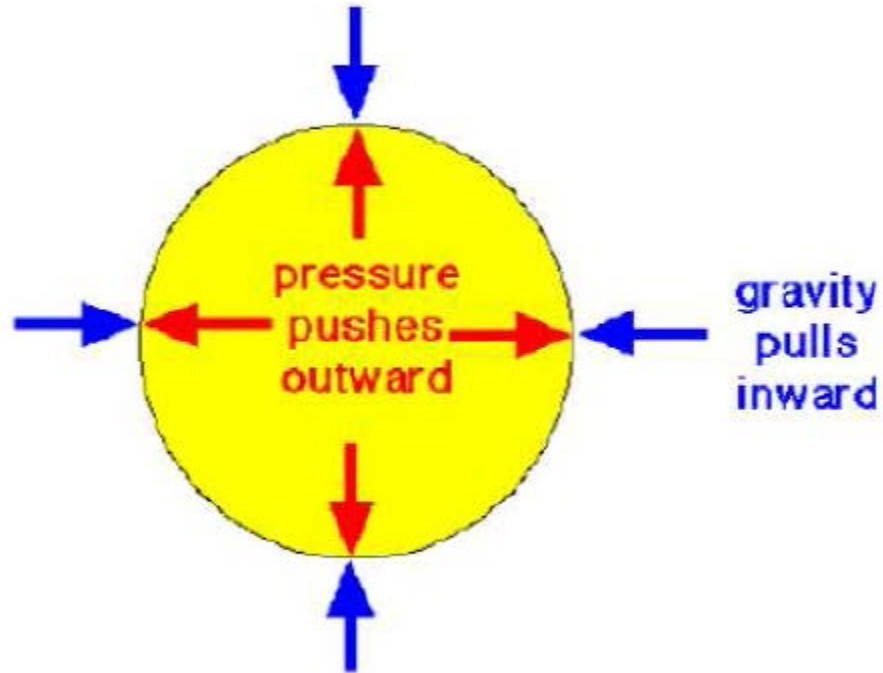

- ❖ A balance between pressure and gravity.

# Gravitational Collapse

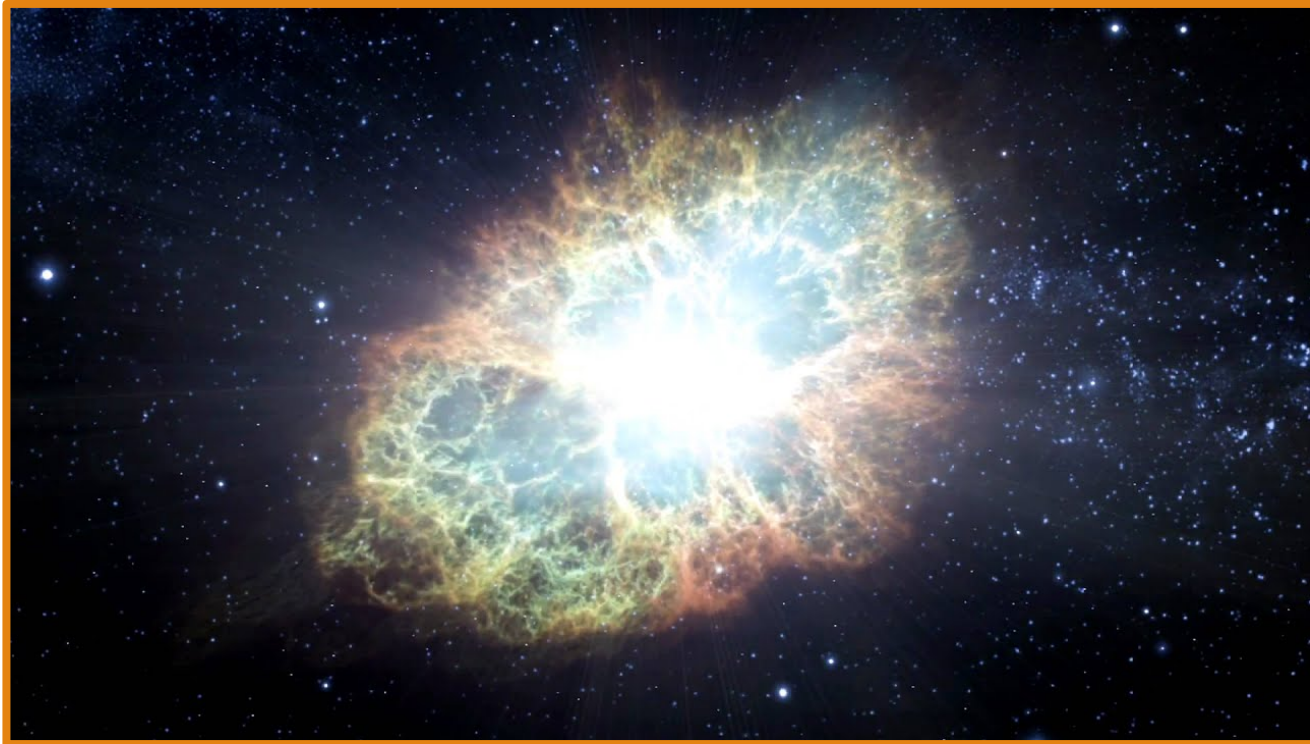

❖ Contraction of astronomical object due to its own gravity.

# Final Outcomes

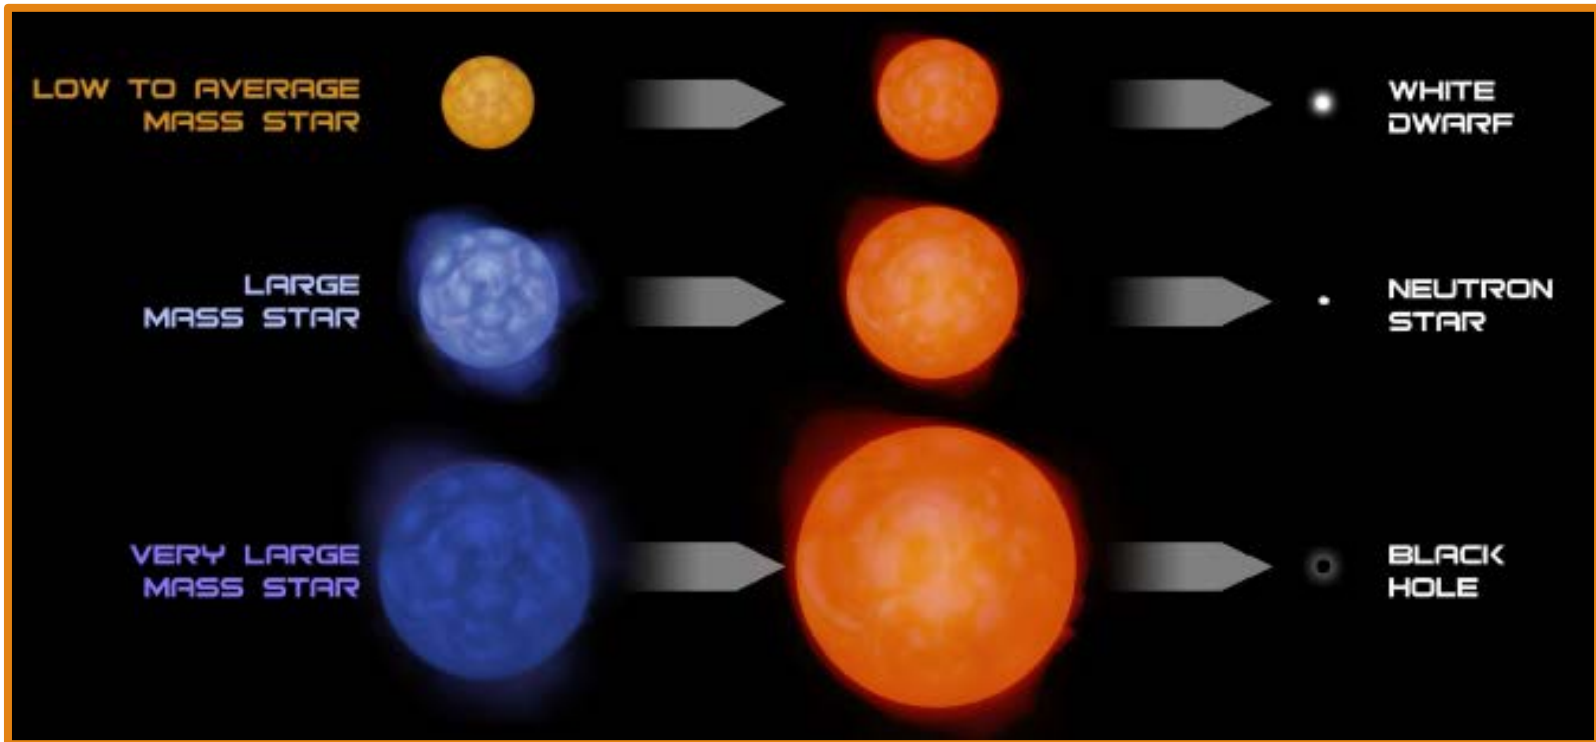

# White Dwarfs

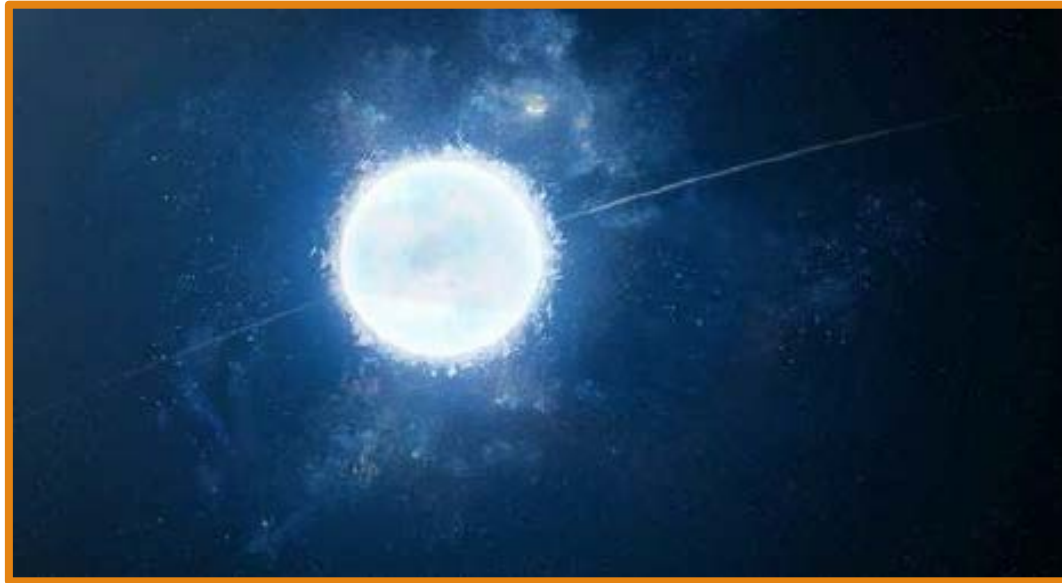

- ❖ White dwarfs are formed from the collapse of a star having mass **less than or equal to 8 times mass of the sun.**
- ❖ Compact stars of masses below 1.4 times mass of the sun.

# Neutron Stars

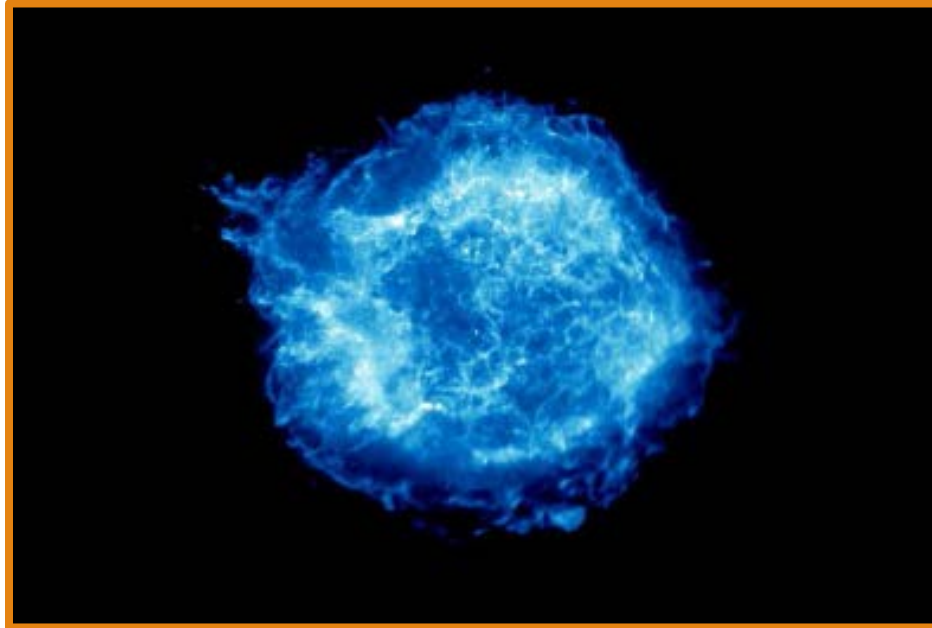

- ❖ Neutron stars are formed from the collapse of a star having mass **between 8 to 20 times mass of the sun.**
- ❖ Compact stars of masses **between 1.4 to 3 times mass of the sun.**

# Black Holes

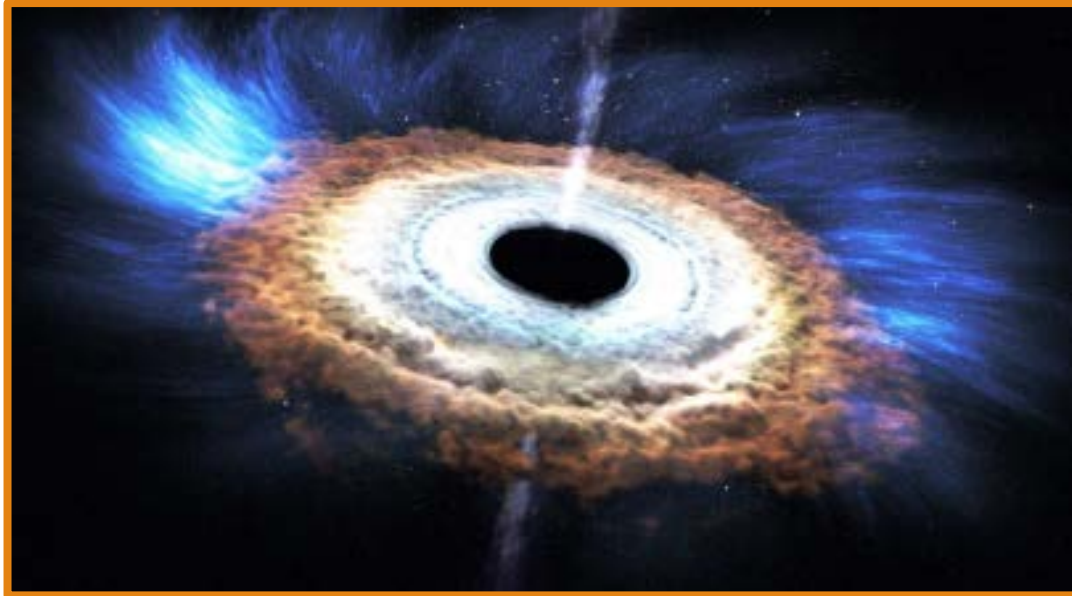

- ❖ Black holes are formed from the collapse of a star having mass **above 20 times mass of the sun.**
- ❖ Strong gravitational effects.

# Energy-Momentum Tensor

- ❖ Symmetric second rank tensor.
- ❖ Describes the energy density, momentum and flow of energy at each point of the spacetime.

$$T_{\mu\nu} = \begin{bmatrix} T_{00} & T_{01} & T_{02} & T_{03} \\ T_{10} & T_{11} & T_{12} & T_{13} \\ T_{20} & T_{21} & T_{22} & T_{23} \\ T_{30} & T_{31} & T_{32} & T_{33} \end{bmatrix} .$$

# Classification of Fluids

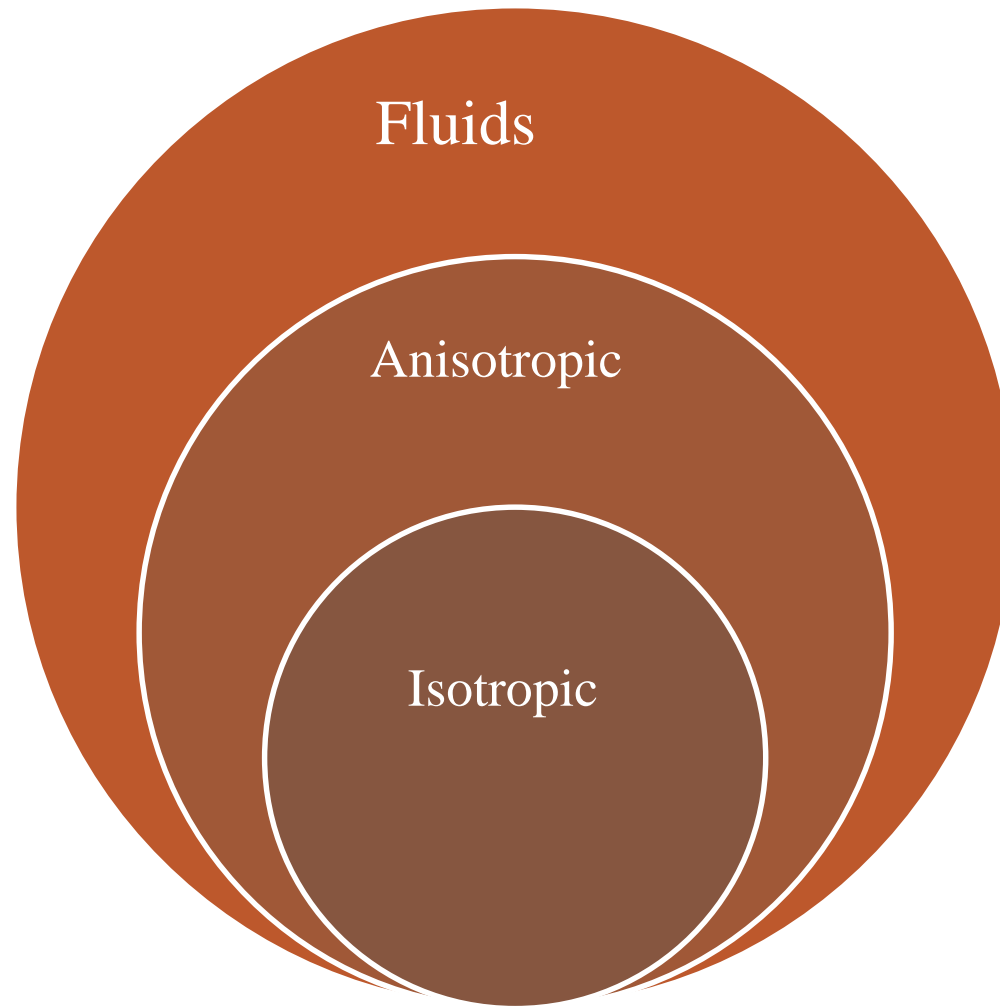



# Anisotropic Fluid

If the pressure of a fluid is dependent on the direction along which it is measured then it is named as anisotropic fluid.

$$\mathcal{T}_{\mu\nu}^{(\mathcal{M})} = (\rho + \mathfrak{p}_{\perp}) \vartheta_{\mu}\vartheta_{\nu} + g_{\mu\nu}\mathfrak{p}_{\perp} + (\mathfrak{p}_r - \mathfrak{p}_{\perp})\chi_{\mu}\chi_{\nu}.$$

# Isotropic Fluid

If the pressure of a fluid is independent of the direction along which it is measured then it is named as isotropic fluid.

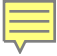

# Perfect Fluid

A fluid that can be completely characterized by its energy density and pressure.

$$T_{\mu\nu}^{(\mathcal{M})} = (\rho + p) \vartheta_\mu \vartheta_\nu + g_{\mu\nu} p.$$

# Dust Fluid

A dust fluid is a pressure less perfect fluid.

$$T_{\mu\nu}^{(\mathcal{M})} = \rho \vartheta_\mu \vartheta_\nu.$$

# Mass

mass → kg

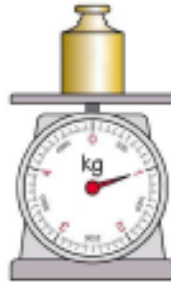

- ❖ A scalar quantity describing total matter present in a body.

# Classification of Mass

## Inertial Mass

- It measures the resistance offered by an object in reaction to a change in its motion.

## Gravitational Mass

- It is a property of matter that determines how matter deals with gravitational forces.

# Inertia and Gravity

- ❖ A combination of inertia and gravity keep the Earth in orbit around the sun and the moon in orbit around the Earth.
- ❖ If there was no gravity, inertia would cause the moon to travel in a straight line.
- ❖ If only gravity existed, the Earth would be pulled into the sun.

# Junction Conditions

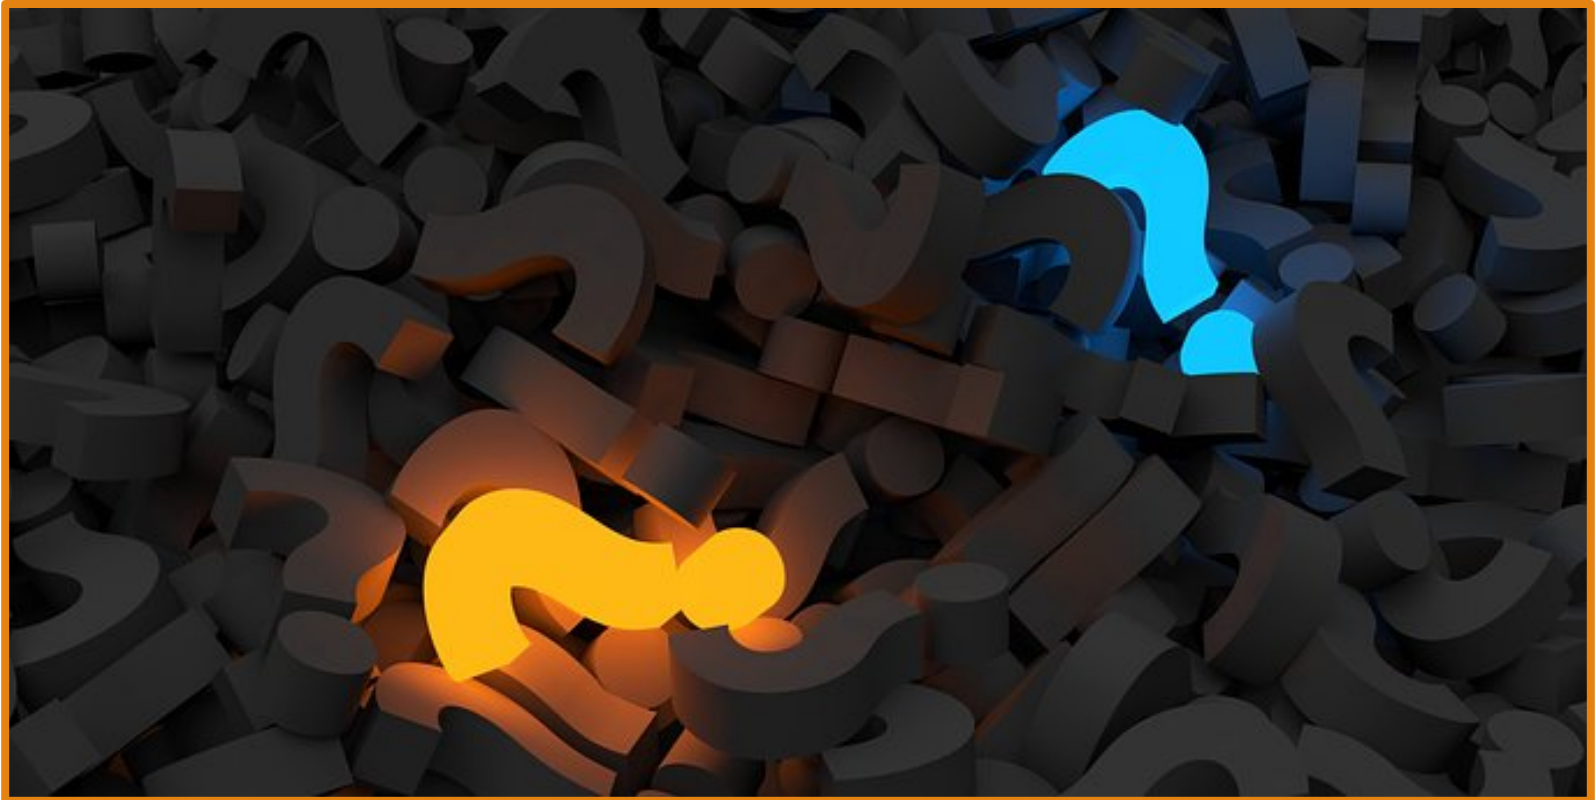

# Junction Conditions

- Hypersurface
- Normal Vector
- Intrinsic Curvature
- Extrinsic Curvature

# Hypersurface

In  $n$ -dimensional manifold, a hypersurface is  $(n - 1)$ -dimensional submanifold.

# Normal Vector

A vector changes its values in the orthogonal direction to hypersurface. A unit vector  $n_\mu$  is defined as

$$n_\mu = \frac{l_{,\mu}}{g^{\mu\nu} l_{,\mu} l_{,\nu}}$$



# Curvature

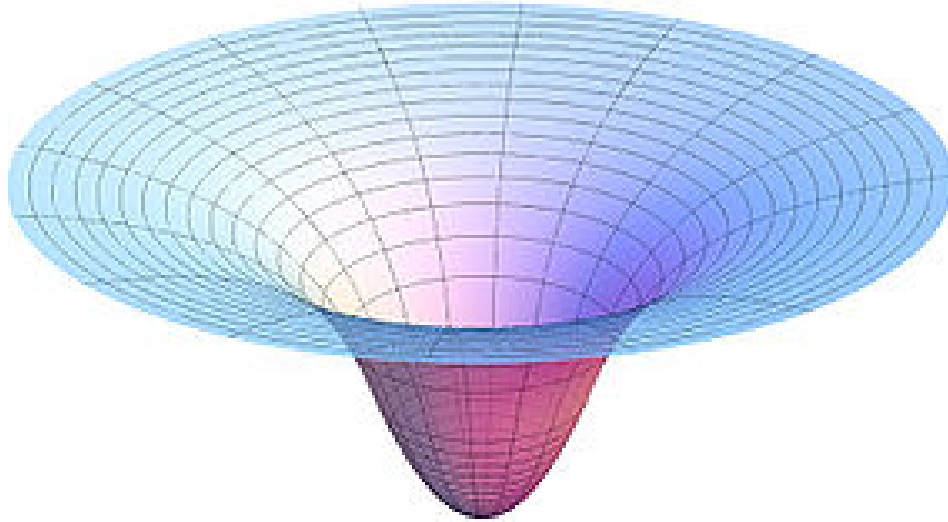

- ❖ Characterizes the deviation of an object from being flat.
- ❖ Change in direction at some particular point.

# Intrinsic Curvature

The deviation of a surface from the flat geometry within the whole surface.

$$ds^2 = g_{\mu\nu} dx^\mu dx^\nu.$$

# Extrinsic Curvature

The curvature of  $(n - 1)$ -dimensional surface, which is embedded in a surface of  $n$ -dimension.

$$K_{ij} = -n_\mu^\pm \left( \frac{\partial^2 x^\mu_\pm}{\partial \psi_i \partial \psi_j} + \Gamma_{\alpha\beta}^\mu \frac{\partial^2 x^\alpha_\pm \partial^2 x^\beta_\pm}{\partial \psi_i \partial \psi_j} \right), \quad (i, j = 0, 2, 3).$$

# Darmois Junction Conditions

## First Fundamental Form

- Continuity of line elements.

## Mathematical Form

$$(ds^2)_\Sigma = (ds^2_-)_\Sigma = (ds^2_+)_\Sigma.$$

## Second Fundamental Form

- Continuity of curvature.

## Mathematical Form

$$[K_{ij}] = K_{ij}^- - K_{ij}^+ = 0.$$

Darmois, G.: Memorial des Sciences Mathematiques  
(Gauthier-Villars, Paris, 1927).

# Dynamical Equations

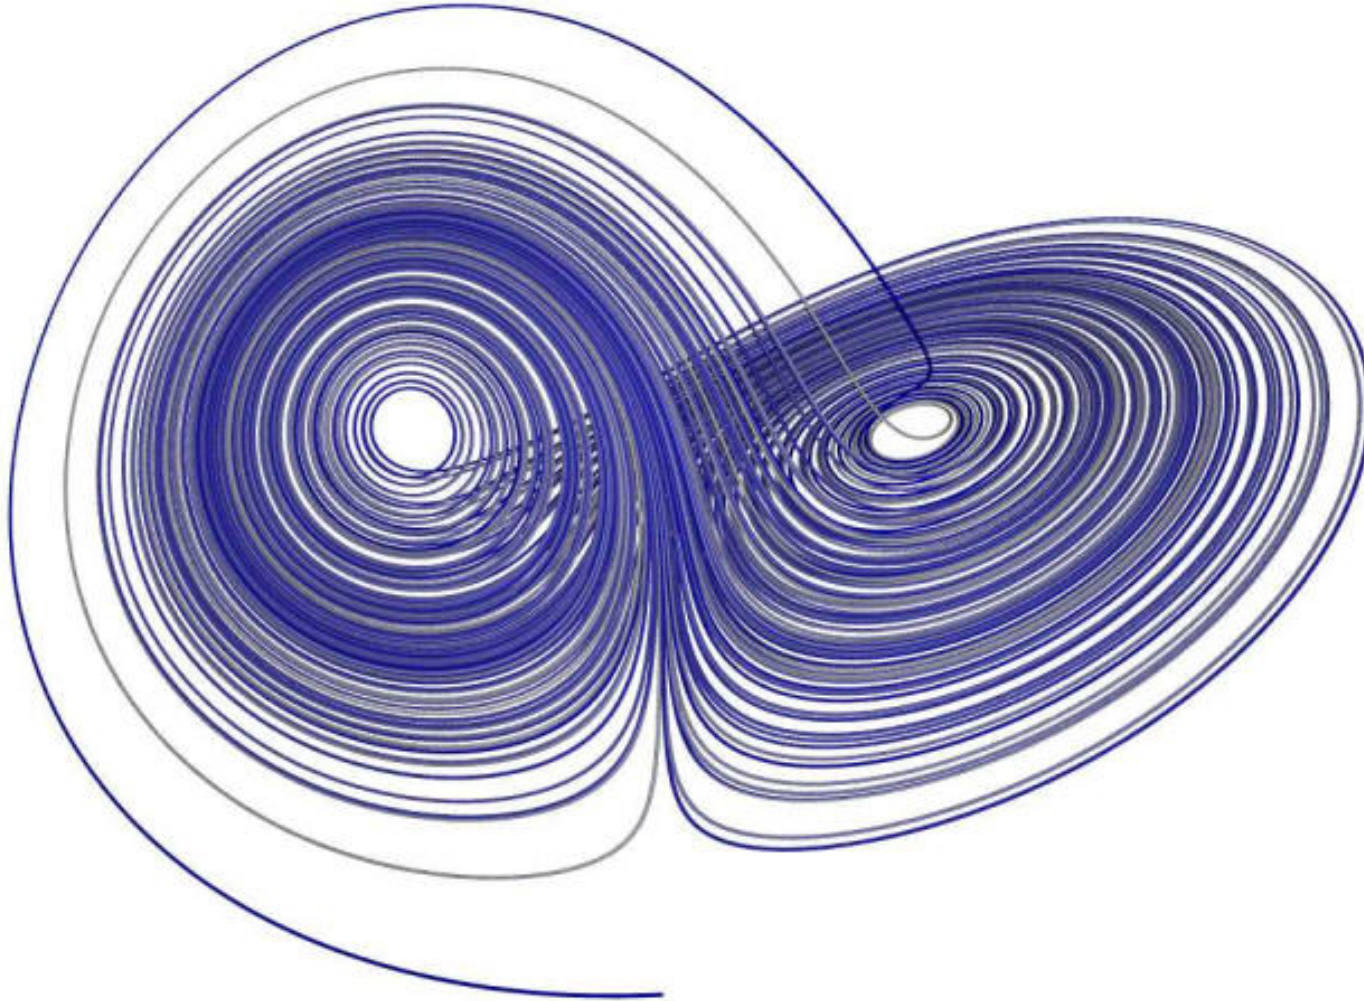

# Weyl Tensor

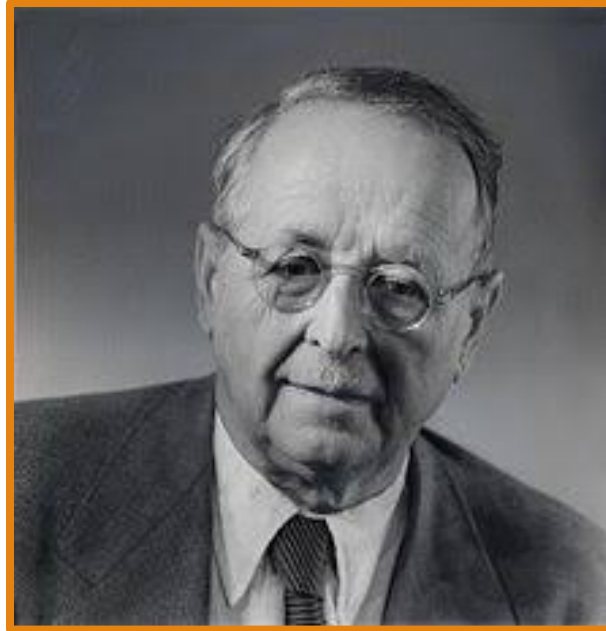

- ❖ Fourth rank tensor.
- ❖ Determines distortion in the shape of body by tidal force.

# Weyl Tensor

$$\begin{aligned} \mathbb{C}_{\mu\nu\alpha\beta} &= \mathcal{R}_{\mu\nu\alpha\beta} + \frac{1}{n-2}(g_{\mu\beta}\mathcal{R}_{\alpha\nu} - g_{\mu\alpha}\mathcal{R}_{\beta\nu} + g_{\nu\alpha}\mathcal{R}_{\beta\mu} - g_{\nu\beta}\mathcal{R}_{\alpha\mu}) \\ &+ \frac{1}{(n-1)(n-2)}(g_{\mu\alpha}g_{\beta\nu} - g_{\mu\beta}g_{\alpha\nu})\mathcal{R}, \quad n \geq 3. \end{aligned}$$

# Weyl Scalar

$$\mathbb{C}^2 = \frac{1}{3}\mathcal{R}^2 + \mathbb{R} - 2\mathcal{R}^{\mu\nu}\mathcal{R}_{\mu\nu}.$$

$$\mathbb{R} = \mathcal{R}^{\mu\nu\xi\eta}\mathcal{R}_{\mu\nu\xi\eta}.$$

# General Theory of Relativity

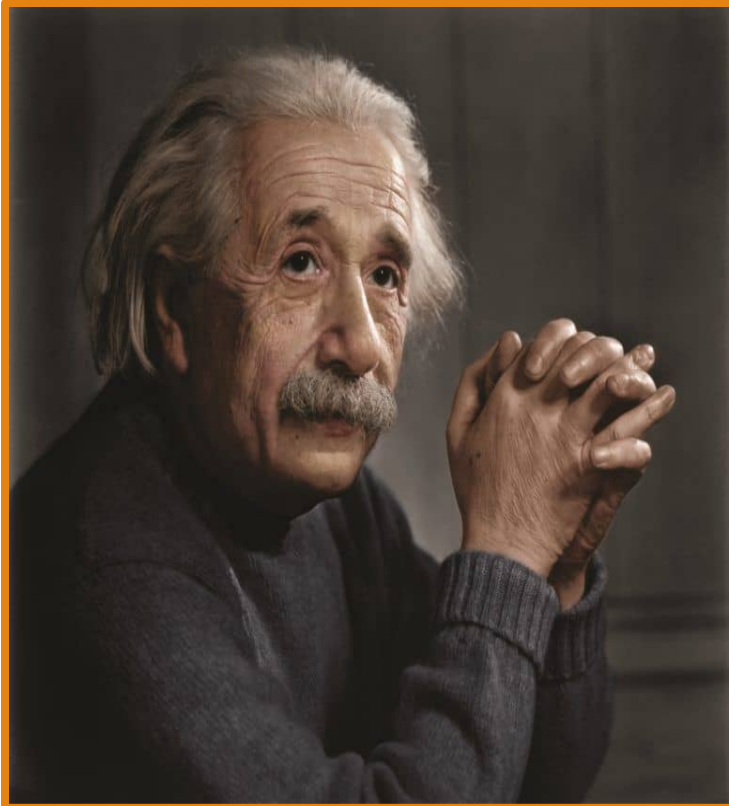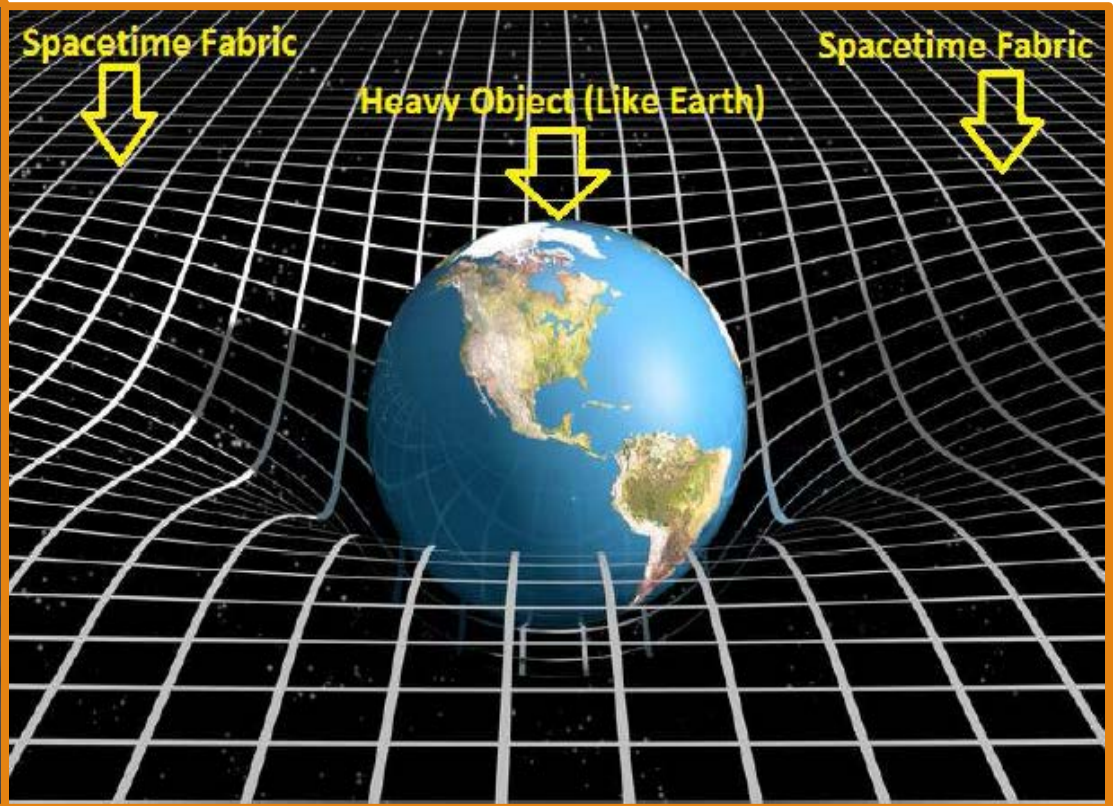



## Principle of General Covariance

- All laws of physics remain same in any coordinate system.

## Principle of Equivalence

- There is no difference between the effects of gravitation and acceleration on spacetime.

# Einstein Field Equations

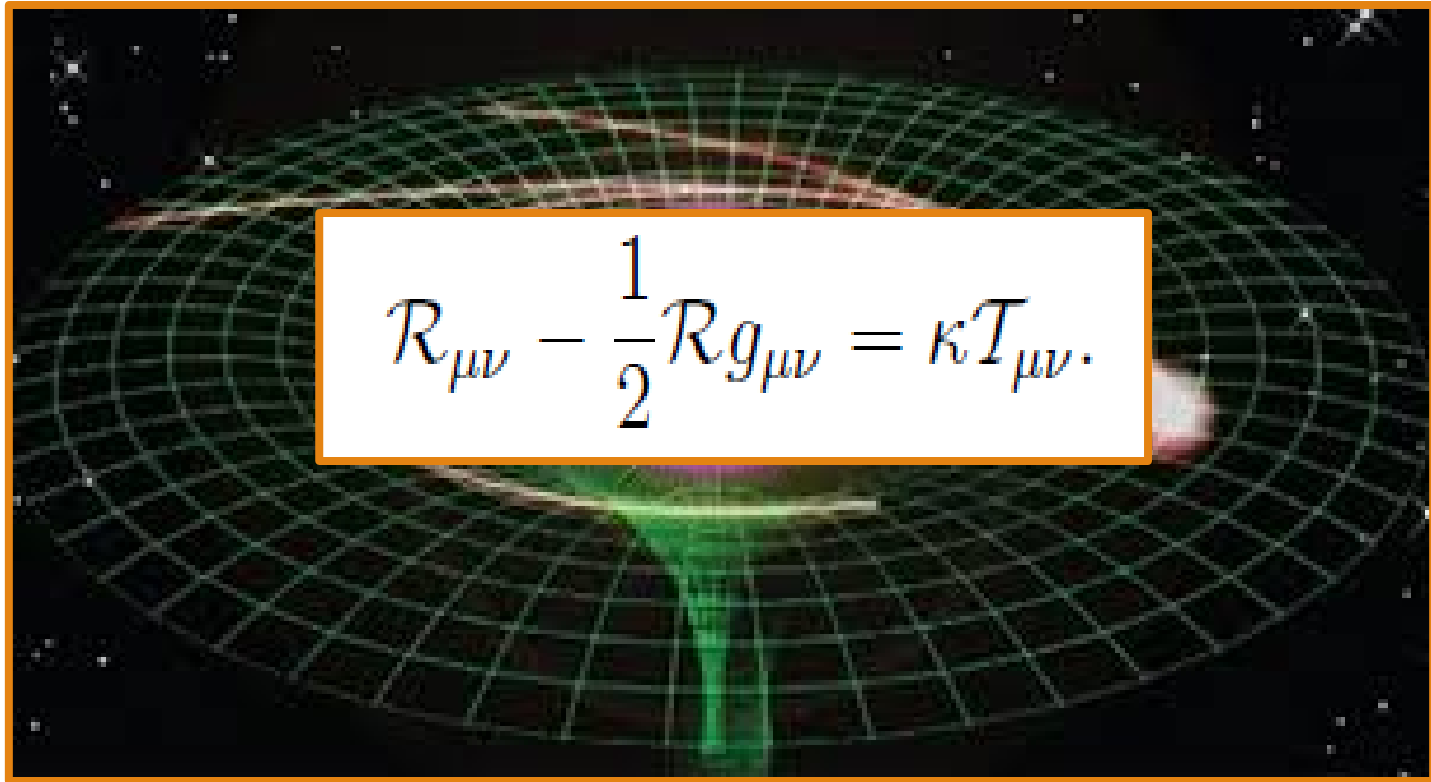

# Modified Theories

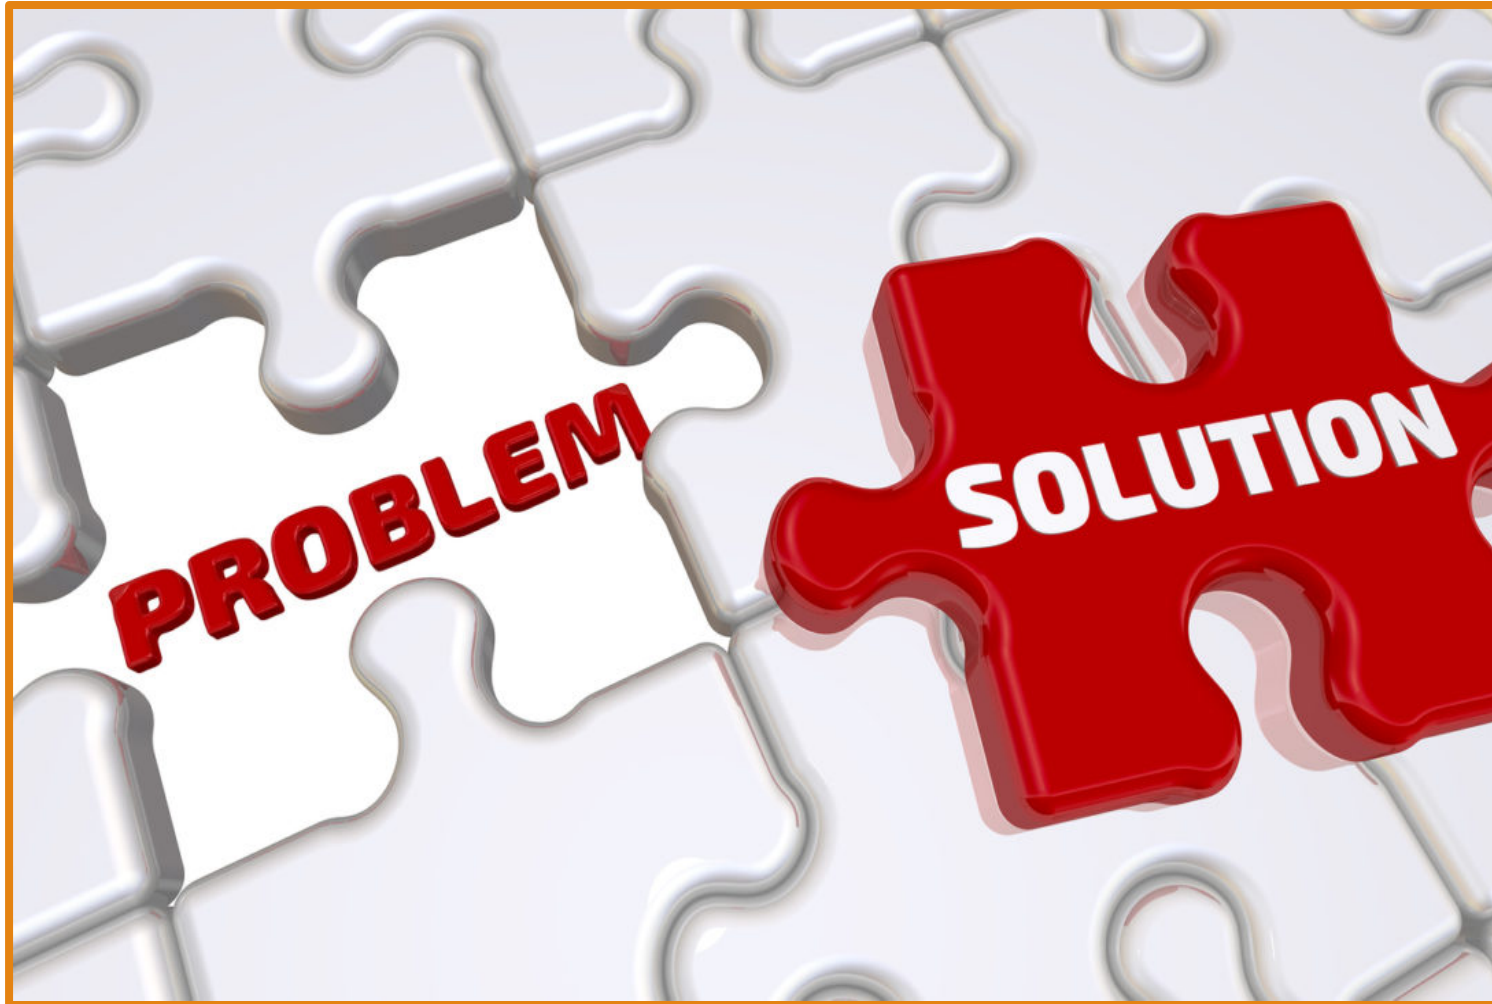

# $f(R)$ Theory

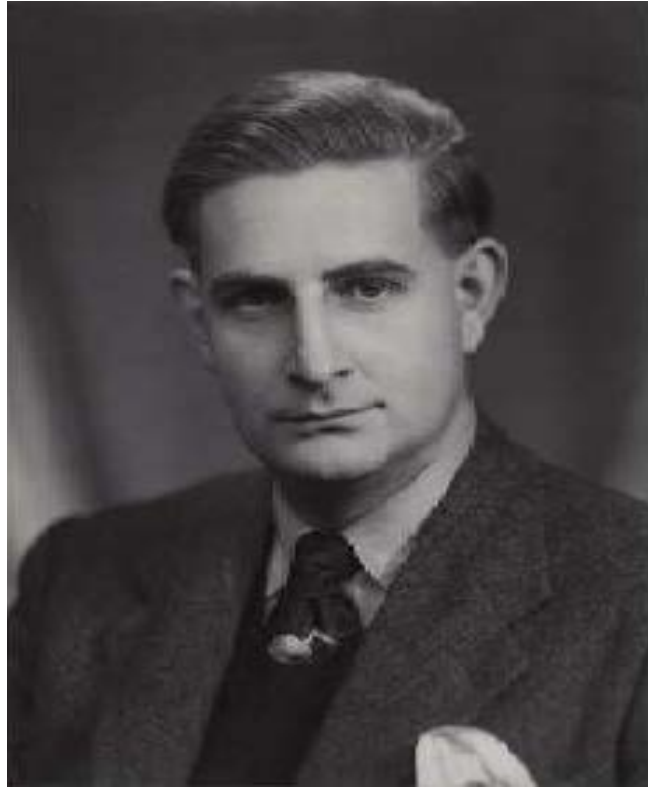

Buchdahl, H.A.: Mon, Not. R. Astron. Soc. **150**(1970)1.

# Action

$$\mathcal{I} = \frac{1}{2\kappa^2} \int f(\mathcal{R}) \sqrt{-g} d^4x + \int \mathcal{L}_m \sqrt{-g} d^4x.$$

# Field Equations

$$\mathcal{R}_{\mu\nu} f_{\mathcal{R}} + g_{\mu\nu} \square f_{\mathcal{R}} - \nabla_{\mu} \nabla_{\nu} f_{\mathcal{R}} - \frac{1}{2} g_{\mu\nu} f = \kappa^2 \mathcal{T}_{\mu\nu},$$

where

$$\square = \nabla_{\mu} \nabla^{\mu}, \quad f \equiv f(\mathcal{R}), \quad f_{\mathcal{R}} = \frac{\partial f}{\partial \mathcal{R}}.$$

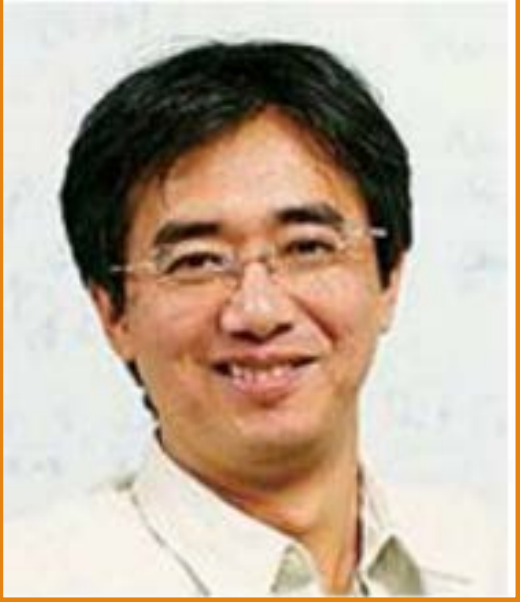

# Curvature-Matter Coupling

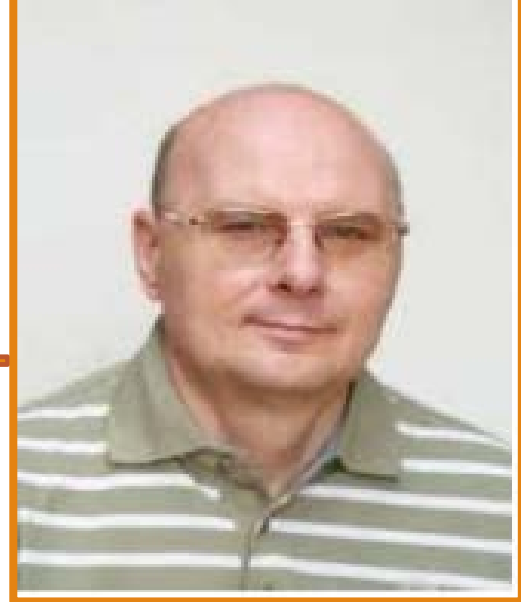

Nojiri, S. and Odintsov, S.D.: Phys. Lett. B **599** (2004) 137 .

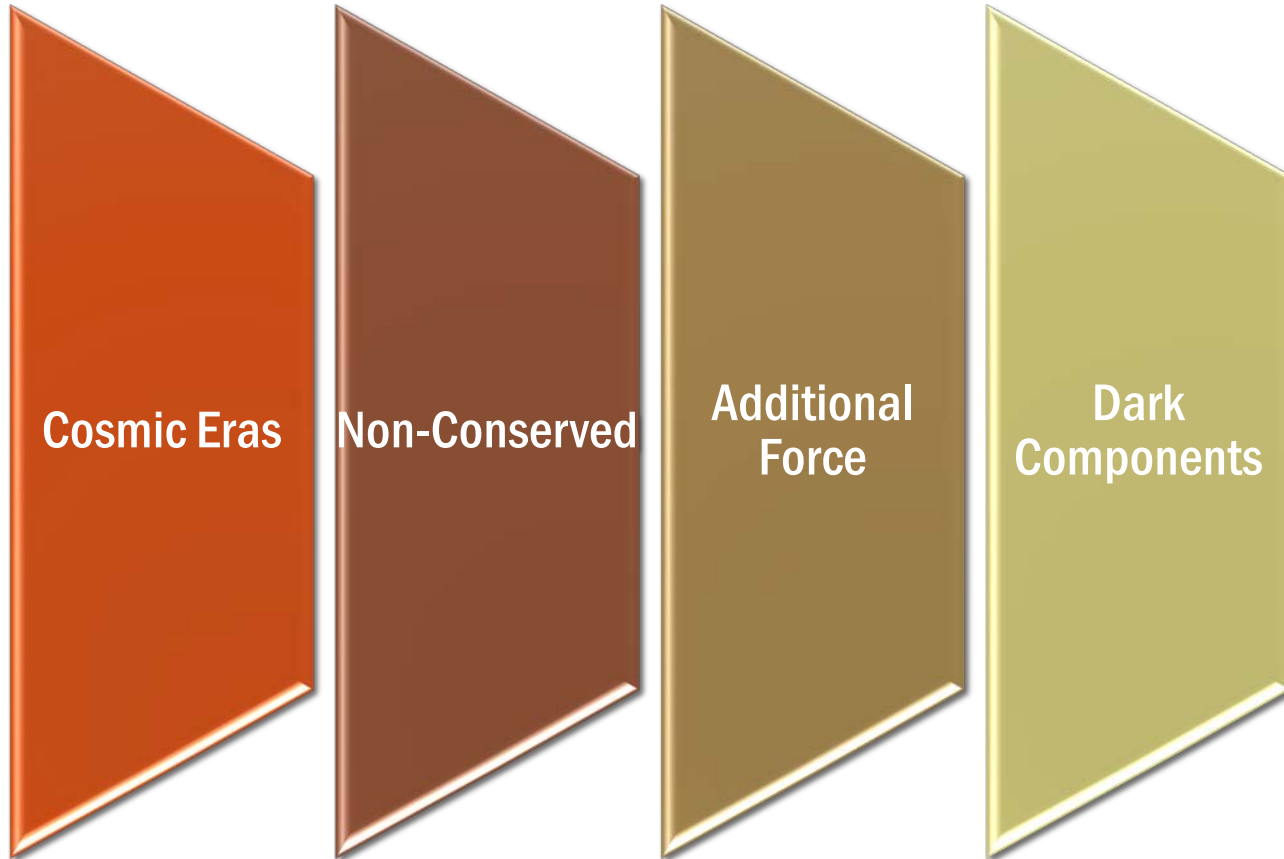

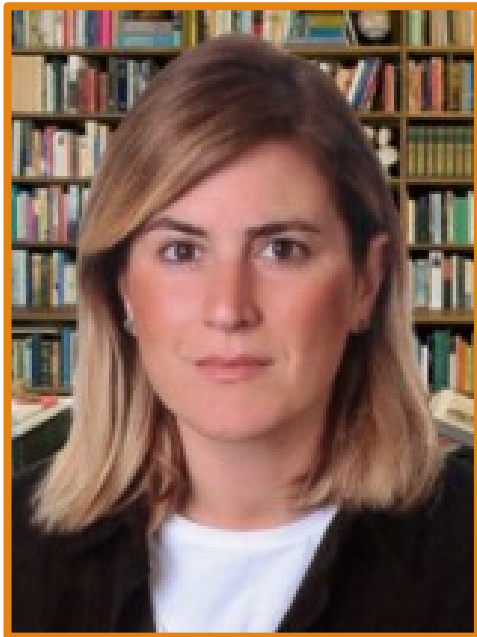

# Energy-Momentum Squared Gravity

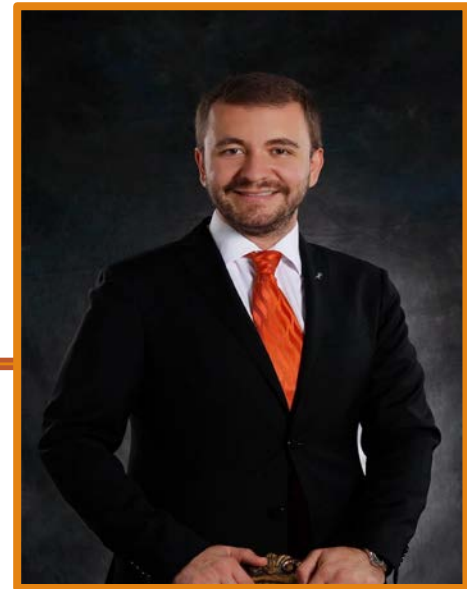

Katirci, N. and Kavuk, M.: Eur. Phys. J. Plus **129**(2014)163.



# Action

$$\mathcal{I} = \frac{1}{2\kappa^2} \int f(\mathcal{R}, T_{\mu\nu} T^{\mu\nu}) \sqrt{-g} d^4x + \int \mathcal{L}_m \sqrt{-g} d^4x.$$

# Field Equations

$$\mathcal{R}_{\mu\nu} f_{\mathcal{R}} + g_{\mu\nu} \square f_{\mathcal{R}} - \nabla_{\mu} \nabla_{\nu} f_{\mathcal{R}} - \frac{1}{2} g_{\mu\nu} f = T_{\mu\nu} - \Theta_{\mu\nu} f_{T_{\mu\nu} T^{\mu\nu}}.$$

where

$$\square = \nabla_{\xi} \nabla^{\xi}, f \equiv f(\mathcal{R}, T_{\mu\nu} T^{\mu\nu}), f_{T_{\mu\nu} T^{\mu\nu}} = \frac{\partial f}{\partial T_{\mu\nu} T^{\mu\nu}}, f_{\mathcal{R}} = \frac{\partial f}{\partial \mathcal{R}} \text{ and}$$

$$\Theta_{\mu\nu} = -2\mathcal{L}_m \left( T_{\mu\nu} - \frac{1}{2} g_{\mu\nu} T \right) - 4 \frac{\partial^2 \mathcal{L}_m}{\partial g^{\mu\nu} \partial g^{\xi\eta}} T^{\xi\eta} - T T_{\mu\nu} + 2 T_{\mu}^{\xi} T_{\nu\xi}.$$

# Salient Features

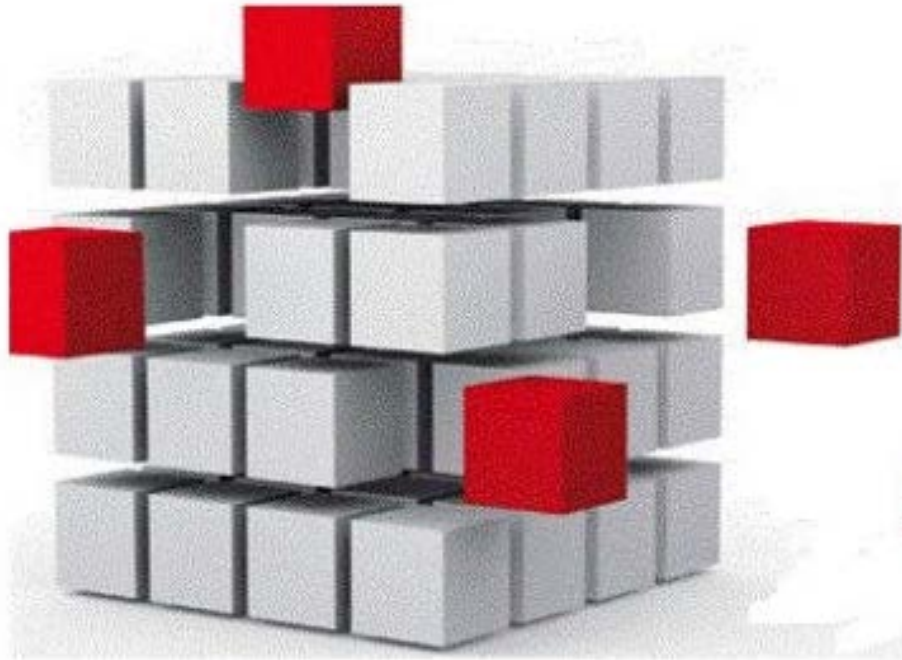

- ❖ Alternative for dark energy.
- ❖ Bounce at early-times.
- ❖ Non-conserved theory.



# Research Work

# Interior Metric

$$ds_-^2 = -\alpha^2(\mathbf{t}, \mathbf{r})dt^2 + \beta^2(\mathbf{t}, \mathbf{r})dr^2 + \gamma^2(\mathbf{t}, \mathbf{r})d\phi^2 + \delta^2(\mathbf{t}, \mathbf{r})dz^2.$$

# Matter Distribution

$$\mathcal{T}_{\mu\nu}^{(\mathcal{M})} = (\rho + \mathfrak{p}_\perp) \vartheta_\mu \vartheta_\nu + g_{\mu\nu} \mathfrak{p}_\perp + (\mathfrak{p}_r - \mathfrak{p}_\perp) \chi_\mu \chi_\nu.$$

# Exterior Metric

$$ds_+^2 = - \left( -\frac{2M(v)}{R} \right) dv^2 - 2dvdr + R^2 (d\phi^2 + \psi^2 dz^2).$$

# Mass Function

$$\mathbb{E} = m(t, r) = \frac{1}{8} (1 - \mathbb{L}^{-2} \nabla^\nu r \nabla_\nu r).$$

$$\mathbb{E} = \frac{\mathbb{L}}{8} + \frac{1}{8\delta} \left\{ \frac{1}{\alpha^2} (\gamma\dot{\delta} + \delta\dot{\gamma})^2 - \frac{1}{\beta^2} (\gamma\delta' + \delta\gamma')^2 \right\}.$$

Throne, K.S.: Phys. Rev. D **138**(1965)B251.

# Field Equations

$$\begin{aligned}\frac{1}{f_{\mathcal{R}}}\left(\rho + \frac{\mathcal{T}_{00}^{(C)}}{\alpha^2}\right) &= \frac{1}{\beta^2}\left(\frac{\beta'\gamma'}{\beta\gamma} - \frac{\gamma'\delta'}{\gamma\delta} - \frac{\gamma''}{\gamma} + \frac{\beta'\delta'}{\beta\delta} - \frac{\delta''}{\delta}\right) \\ &+ \frac{1}{\alpha^2}\left(\frac{\dot{\gamma}\dot{\delta}}{\gamma\delta} + \frac{\dot{\beta}\dot{\delta}}{\beta\delta} + \frac{\dot{\beta}\dot{\gamma}}{\beta\gamma}\right), \\ \frac{1}{f_{\mathcal{R}}}\left(\mathfrak{p}_{\tau} + \frac{\mathcal{T}_{11}^{(C)}}{\beta^2}\right) &= \frac{1}{\alpha^2}\left(-\frac{\dot{\gamma}\dot{\delta}}{\gamma\delta} + \frac{\dot{\alpha}\dot{\delta}}{\alpha\delta} - \frac{\ddot{\gamma}}{\gamma} + \frac{\dot{\alpha}\dot{\gamma}}{\alpha\gamma} - \frac{\ddot{\delta}}{\delta}\right) \\ &+ \frac{1}{\beta^2}\left(\frac{\alpha'\delta'}{\alpha\delta} + \frac{\alpha'\gamma'}{\alpha\gamma} + \frac{\gamma'\delta'}{\gamma\delta}\right),\end{aligned}$$

$$\begin{aligned}
\frac{1}{f_{\mathcal{R}}} \left( \mathbf{p}_{\perp} + \frac{\mathcal{T}_{22}^{(C)}}{\gamma^2} \right) &= \frac{1}{\beta^2} \left( \frac{\alpha' \delta'}{\alpha \delta} - \frac{\delta' \beta'}{\delta \beta} + \frac{\alpha''}{\alpha} - \frac{\alpha' \beta'}{\alpha \beta} + \frac{\delta''}{\delta} \right) \\
&+ \frac{1}{\alpha^2} \left( \frac{\dot{\alpha} \dot{\beta}}{\alpha \beta} - \frac{\dot{\beta} \dot{\delta}}{\beta \delta} - \frac{\ddot{\beta}}{\beta} + \frac{\dot{\alpha} \dot{\delta}}{\alpha \delta} - \frac{\ddot{\delta}}{\delta} \right), \\
\frac{1}{f_{\mathcal{R}}} \left( \mathbf{p}_{\perp} + \frac{\mathcal{T}_{33}^{(C)}}{\delta^2} \right) &= \frac{1}{\beta^2} \left( \frac{\alpha' \gamma'}{\alpha \gamma} - \frac{\gamma' \beta'}{\gamma \beta} + \frac{\alpha''}{\alpha} - \frac{\alpha' \beta'}{\alpha \beta} + \frac{\gamma''}{\gamma} \right) \\
&+ \frac{1}{\alpha^2} \left( \frac{\dot{\alpha} \dot{\beta}}{\alpha \beta} - \frac{\dot{\beta} \dot{\gamma}}{\beta \gamma} - \frac{\ddot{\beta}}{\beta} + \frac{\dot{\alpha} \dot{\gamma}}{\alpha \gamma} - \frac{\ddot{\gamma}}{\gamma} \right), \\
\frac{1}{f_{\mathcal{R}}} \left( \mathcal{T}_{01}^{(C)} \right) &= \left( \frac{\gamma' \dot{\beta}}{\gamma \beta} + \frac{\alpha' \dot{\delta}}{\alpha \delta} - \frac{\dot{\gamma}'}{\gamma} + \frac{\alpha' \dot{\gamma}}{\alpha \gamma} - \frac{\dot{\delta}'}{\delta} + \frac{\delta' \dot{\beta}}{\delta \beta} \right).
\end{aligned}$$

# Darmois Junction conditions

$$\mathbb{E} - M = \frac{\mathbb{L}}{8}, \quad \psi = \frac{1}{2},$$
$$p_{\tau} + \frac{T_{11}^{(C)}}{\beta^2} = -\frac{T_{01}^{(C)}}{\alpha\beta}.$$



# Proper Time and Radial Derivatives

$$\mathfrak{D}_t = \frac{1}{\alpha} \frac{\partial}{\partial t}, \quad (1)$$

$$\mathfrak{D}_r = \frac{1}{\gamma'} \frac{\partial}{\partial r}. \quad (2)$$

## Velocity of Fluid Particles

$$U = \mathfrak{D}_t(\gamma) = \frac{\dot{\gamma}}{\alpha} < 0. \quad (3)$$

Misner, C.W. and Sharp, D.H.: Phys. Rev. B  
**136**(1964)571.

# Dynamical Equations

$$(\mathcal{T}^{(\mathcal{M})\mu\nu} + \mathcal{T}^{(C)\mu\nu})_{;\nu} \mathcal{X}_\mu = 0,$$

$$(\mathcal{T}^{(\mathcal{M})\mu\nu} + \mathcal{T}^{(C)\mu\nu})_{;\nu} \vartheta_\mu = 0.$$

$$\begin{aligned} & \frac{\alpha'}{\alpha} \left( \rho + \mathfrak{p}_\tau + \frac{\mathcal{T}_{00}^{(C)}}{\alpha^2} + \frac{\mathcal{T}_{11}^{(C)}}{\beta^2} \right) + \left( \mathfrak{p}_\tau + \frac{\mathcal{T}_{11}^{(C)}}{\beta^2} \right)' - \frac{\beta}{\alpha} \left( \frac{\mathcal{T}_{01}^{(C)}}{\alpha\beta} \right)' \\ & - \frac{\mathcal{T}_{01}^{(C)}}{\psi\alpha^2} \left( \frac{\dot{\beta}}{\beta} + \frac{\dot{\gamma}}{\gamma} \right) + \frac{\gamma'}{\psi\gamma} \left( \mathfrak{p}_\tau - \mathfrak{p}_\perp + \frac{\mathcal{T}_{11}^{(C)}}{\beta^2} - \frac{\mathcal{T}_{22}^{(C)}}{\gamma^2} \right) = 0, \end{aligned} \quad (4)$$

$$\begin{aligned} & \frac{\dot{\beta}}{\beta} \left( \rho + \mathfrak{p}_\tau + \frac{\mathcal{T}_{00}^{(C)}}{\alpha^2} + \frac{\mathcal{T}_{11}^{(C)}}{\beta^2} \right) + \alpha^2 \left( \frac{\mathcal{T}_{00}^{(C)}}{\alpha^4} \right)' + \frac{\dot{\alpha}}{\beta\alpha} \left( \frac{\mathcal{T}_{00}^{(C)}}{\alpha^2} \right)' \\ & + \dot{\rho} - \frac{\alpha}{\beta} \left( \frac{\mathcal{T}_{01}^{(C)}}{\alpha\beta} \right)' + \frac{\dot{\gamma}}{\psi\gamma} \left( \rho + \mathfrak{p}_\perp + \frac{\mathcal{T}_{00}^{(C)}}{\alpha^2} + \frac{\mathcal{T}_{22}^{(C)}}{\gamma^2} \right) \\ & - \frac{\mathcal{T}_{01}^{(C)}}{\psi\beta^2} \left( \frac{\alpha'}{\alpha} + \frac{\gamma'}{\gamma} \right) = 0. \end{aligned} \quad (5)$$

# Proper Time Variation

$$\mathfrak{D}_t(\mathbb{E}) = -\frac{\psi\gamma^2}{2} \left\{ \left( p_r + \frac{T_{11}^{(C)}}{\beta^2} \right) \mathcal{U} - \frac{T_{01}^{(C)}}{\alpha\beta} \varphi \right\} + \frac{\psi\mathcal{U}}{4}. \quad (6)$$

# Proper Radial Variation

$$\mathfrak{D}_r(\mathbb{E}) = \frac{\psi\gamma^2}{2} \left\{ \left( \rho + \frac{T_{00}^{(C)}}{\alpha^2} \right) - \frac{T_{01}^{(C)}}{\alpha\beta} \frac{\mathcal{U}}{\varphi} \right\} + \frac{\psi}{4}. \quad (7)$$

# Acceleration of the Fluid Particles

The acceleration of the collapsing system is

$$\mathfrak{D}_t(\mathcal{U}) = -\frac{\gamma}{2} \left( \mathfrak{p}_\tau + \frac{\mathcal{T}_{11}^{(C)}}{\beta^2} \right) - \frac{1}{\psi\gamma^2} \left( \mathbb{E} - \frac{\mathbb{L}}{8} \right) + \frac{\varphi}{\beta} \frac{\alpha'}{\alpha}. \quad (8)$$

Using Eq.(4), we have

$$\begin{aligned} \frac{\alpha'}{\alpha} = & \left( \rho + \mathfrak{p}_\tau + \frac{\mathcal{T}_{00}^{(C)}}{\alpha^2} + \frac{\mathcal{T}_{11}^{(C)}}{\beta^2} \right)^{-1} \left\{ \frac{\beta}{\alpha} \left( \frac{\mathcal{T}_{01}^{(C)}}{\alpha\beta} \right)' + \frac{\mathcal{T}_{01}^{(C)}}{\psi\alpha^2} \left( \frac{\dot{\beta}}{\beta} + \frac{\dot{\gamma}}{\gamma} \right) \right. \\ & \left. - \left( \mathfrak{p}_\tau + \frac{\mathcal{T}_{11}^{(C)}}{Y^2} \right)' - \frac{\gamma'}{\psi\gamma} \left( \mathfrak{p}_\tau - \mathfrak{p}_\perp + \frac{\mathcal{T}_{11}^{(C)}}{\beta^2} - \frac{\mathcal{T}_{22}^{(C)}}{\gamma^2} \right) \right\}. \end{aligned}$$

Substituting this value in Eq.(8), we obtain

$$\mathcal{F}_{newtn} = -\mathcal{F}_{grav} + \mathcal{F}_{hyd} + \mathcal{F}_{ds},$$

where

$$\mathcal{F}_{newtn} = \left( \rho + p_{\tau} + \frac{T_{00}^{(C)}}{\alpha^2} + \frac{T_{11}^{(C)}}{\beta^2} \right) \mathcal{D}_t(\mathcal{U}),$$

$$\mathcal{F}_{grav} = \left( \rho + p_{\tau} + \frac{T_{00}^{(C)}}{\alpha^2} + \frac{T_{11}^{(C)}}{\beta^2} \right) \left\{ \frac{\gamma}{2} \left( p_{\tau} + \frac{T_{11}^{(C)}}{\beta^2} \right) + \frac{1}{\psi\gamma^2} \left( \mathbb{E} - \frac{\mathbb{L}}{8} \right) \right\},$$

$$\mathcal{F}_{hyd} = -\varphi^2 \left\{ \mathcal{D}_{\tau} \left( p_{\tau} + \frac{T_{11}^{(C)}}{\beta^2} \right) + \frac{1}{\psi\gamma} \left( p_{\tau} - p_{\perp} + \frac{T_{11}^{(C)}}{\beta^2} - \frac{T_{22}^{(C)}}{\gamma^2} \right) \right\},$$

$$\mathcal{F}_{ds} = \varphi \left\{ \mathcal{D}_t \left( \frac{T_{01}^{(C)}}{\alpha\beta} \right) + \frac{T_{01}^{(C)}}{\psi\alpha\beta} \left( \frac{\dot{\beta}}{\alpha\beta} + \frac{\mathcal{U}}{\gamma} \right) \right\}.$$

# Relation between Weyl Scalar and Matter Variables

Manipulating the Kretschmann scalar, we have

$$\begin{aligned} \mathbb{R} &= \frac{48}{\psi^2 \gamma^6} \left( \mathbb{E} - \frac{\mathbb{L}}{8} \right)^2 - \frac{16}{\psi \gamma^3} \left( \mathbb{E} - \frac{\mathbb{L}}{8} \right) \left( \frac{\mathcal{G}_{00}}{\alpha^2} - \frac{\mathcal{G}_{11}}{\beta^2} + \frac{\mathcal{G}_{22}}{\gamma^2} \right) \\ &\quad - \frac{2\mathcal{G}_{00}\mathcal{G}_{11}}{\beta^2 \alpha^2} + \frac{4\mathcal{G}_{22}}{\gamma^2} \left( \frac{\mathcal{G}_{00}}{\alpha^2} - \frac{\mathcal{G}_{11}}{\beta^2} \right) + 4 \left( \frac{\mathcal{G}_{22}}{\gamma^2} \right)^2 - 4 \left( \frac{\mathcal{G}_{01}}{\alpha\beta} \right)^2 \\ &\quad + 3 \left( \frac{\mathcal{G}_{00}}{\alpha^2} \right)^2 + 3 \left( \frac{\mathcal{G}_{11}}{\beta^2} \right)^2 . \end{aligned}$$

Substituting the value of Kretschmann scalar, Ricci scalar and Ricci tensor, we have

$$\frac{C\gamma^3\psi}{\sqrt{48}} = \mathbb{E} - \frac{\mathbb{L}}{8} - \frac{\psi\gamma^3}{6} \left( \rho - p_r + p_\perp + \frac{T_{00}^{(C)}}{\alpha^2} - \frac{T_{11}^{(C)}}{\beta^2} + \frac{T_{22}^{(C)}}{\gamma^2} \right).$$

The proper radial derivative of Weyl scalar becomes

$$\begin{aligned} \mathfrak{D}_r \left( \frac{C\gamma^3\psi}{\sqrt{48}} \right) + \frac{\psi\gamma^3}{6} \mathfrak{D}_r \left\{ \left( \rho - p_r + p_\perp + \frac{T_{00}^{(C)}}{\alpha^2} - \frac{T_{11}^{(C)}}{\beta^2} + \frac{T_{22}^{(C)}}{\gamma^2} \right) \right\} \\ - \frac{\gamma^2\psi}{2} \left\{ \left( p_r - p_\perp + \frac{T_{11}^{(C)}}{\beta^2} - \frac{T_{22}^{(C)}}{\gamma^2} \right) - \frac{\mathcal{U}}{\varphi} \frac{T_{01}^{(C)}}{\alpha\beta} \right\} = 0. \end{aligned}$$

## Minimal Coupling Model

$$f(\mathcal{R}, T_{\mu\nu} T^{\mu\nu}) = f_1(\mathcal{R}) + f_2(T_{\mu\nu} T^{\mu\nu}).$$

$$\mathcal{D}_r \left( \frac{C\gamma^3\psi}{\sqrt{48}} \right) - \frac{\gamma^2\psi}{2} (\mathfrak{p}_r - \mathfrak{p}_\perp) + \frac{\gamma^3\psi}{6f_{\mathcal{R}}} \mathcal{D}_r(\rho - \mathfrak{p}_r + \mathfrak{p}_\perp + f_0) = 0.$$

where

$$f_0 = \frac{\mathcal{R}_0 f_{\mathcal{R}} - f(\mathcal{R}_0) - f_2(T_{\mu\nu} T^{\mu\nu})}{2}.$$

Bahamonde, S., Marciu, M. and Rudra, P.: Phys. Rev. D **100**(2019)083511.



We assume isotropic matter distribution, above equation becomes

$$\mathfrak{D}_\tau \left( \frac{C\gamma^3\psi}{\sqrt{48}} \right) + \frac{\gamma^3\psi}{6f_{\mathcal{R}}} \mathfrak{D}_\tau(\rho + f_0) = 0.$$

This implies that

$$C = 0 \iff \mathfrak{D}_\tau\rho = 0.$$

# CONCLUSION

- ❖ We have analyzed the dynamics of anisotropic cylindrical collapse in the background of energy-momentum squared gravity.
- ❖ The collapsing phenomenon is reduced by the positive values of correction terms and anisotropy whereas negative values enhance the collapse rate.

- ❖ The total energy in the spherical star and adjacent surfaces increases due to outward effective radial pressure and energy density.
  
- ❖ The spacetime is conformally flat if and only if energy density is homogeneous through out the system. It is concluded that the rate of collapse is slower as compared to general relativity.

Thankyou.
